# Supplementary material for: 20-Year Trends in the Pharmacologic Treatment of Bipolar Disorder by Psychiatrists in Outpatient Care Settings
Source: Atypon-hosted journal article supplement (doi:10.1176/appi.ajp.2020.19091000), 2020-04-21
Supplement: appi.ajp.2020.19091000.ds001.pdf [file appi.ajp.2020.19091000.ds001.pdf]

**FIGURE S1. Prescribing trends of second-generation antipsychotics (SGAs) with and without olanzapine-fluoxetine, 1997-2016**

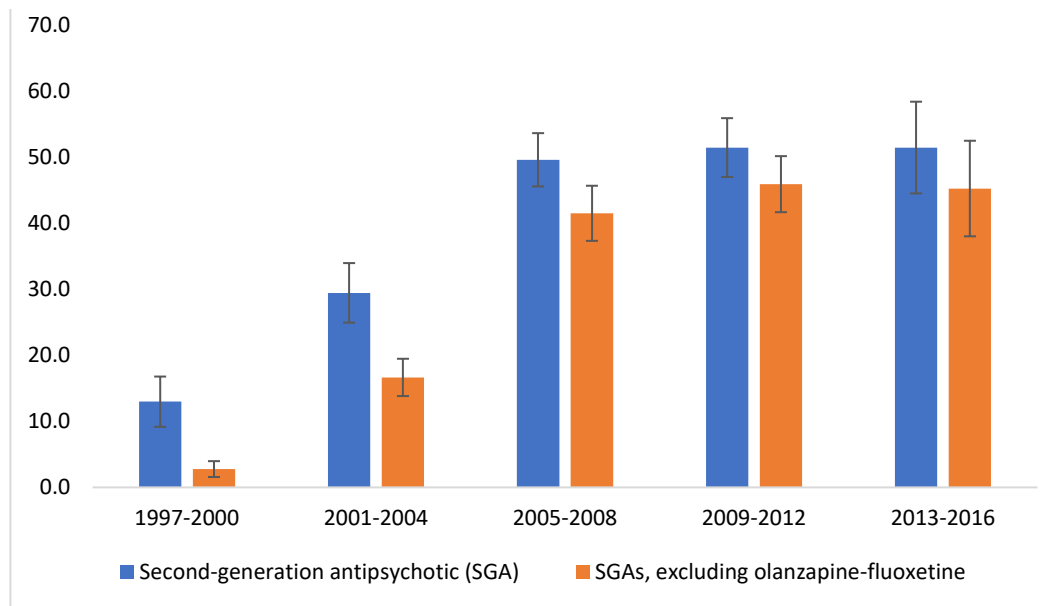

Note: Data are from National Ambulatory Medical Care Survey, 1997-2016. Bars represent 95% confidence intervals.

**TABLE S1.** ICD-9 and ICD-10 codes for bipolar disorder

| ICD-9-CM                 | Description                                                                                                   |   | ICD-10 |
|--------------------------|---------------------------------------------------------------------------------------------------------------|---|--------|
| <b>Bipolar mania</b>     |                                                                                                               |   |        |
| 29600                    | BIPOLAR I DISORDER, SINGLE MANIC EPISODE, UNSPECIFIED DEGREE                                                  | → | F3010  |
| 29601                    | BIPOLAR I DISORDER, SINGLE MANIC EPISODE, MILD DEGREE                                                         | → | F3011  |
| 29602                    | BIPOLAR I DISORDER, SINGLE MANIC EPISODE, MODERATE DEGREE                                                     | → | F3012  |
| 29603                    | BIPOLAR I DISORDER, SINGLE MANIC EPISODE, SEVERE DEGREE WITHOUT MENTION OF PSYCHOTIC BEHAVIOR                 | → | F3013  |
| 29604                    | BIPOLAR I DISORDER, SINGLE MANIC EPISODE, SEVERE DEGREE, SPECIFIED AS WITH PSYCHOTIC BEHAVIOR                 | → | F302   |
| 29605                    | BIPOLAR I DISORDER, SINGLE MANIC EPISODE, IN PARTIAL OR UNSPECIFIED REMISSION                                 | → | F303   |
| 29606                    | BIPOLAR I DISORDER, SINGLE MANIC EPISODE, IN FULL REMISSION                                                   | → | F304   |
| 29610                    | MANIC AFFECTIVE DISORDER RECURRENT EPISODE UNSPECIFIED DEGREE                                                 | → | F3010  |
| 29611                    | MANIC AFFECTIVE DISORDER RECURRENT EPISODE MILD DEGREE                                                        | → | F3011  |
| 29612                    | MANIC AFFECTIVE DISORDER RECURRENT EPISODE MODERATE DEGREE                                                    | → | F3012  |
| 29613                    | MANIC AFFECTIVE DISORDER RECURRENT EPISODE SEVERE DEGREE WITHOUT PSYCHOTIC BEHAVIOR                           | → | F3013  |
| 29614                    | MANIC AFFECTIVE DISORDER RECURRENT EPISODE SEVERE DEGREE SPECIFIED AS WITH PSYCHOTIC BEHAVIOR                 | → | F302   |
| 29615                    | MANIC AFFECTIVE DISORDER RECURRENT EPISODE IN PARTIAL OR UNSPECIFIED REMISSION                                | → | F303   |
| 29616                    | MANIC AFFECTIVE DISORDER RECURRENT EPISODE IN FULL REMISSION                                                  | → | F304   |
| 29640                    | BIPOLAR I DISORDER, MOST RECENT EPISODE (OR CURRENT) MANIC UNSPECIFIED DEGREE                                 | → | F3110  |
| 29641                    | BIPOLAR I DISORDER, MOST RECENT EPISODE (OR CURRENT) MANIC MILD DEGREE                                        | → | F3111  |
| 29642                    | BIPOLAR I DISORDER, MOST RECENT EPISODE (OR CURRENT) MANIC MODERATE DEGREE                                    | → | F3112  |
| 29643                    | BIPOLAR AFFECTIVE DISORDER MANIC SEVERE DEGREE, WITHOUT MENTION OF PSYCHOTIC BEHAVIOR                         | → | F3113  |
| 29644                    | BIPOLAR I DISORDER, MOST RECENT EPISODE (OR CURRENT) MANIC SEVERE DEGREE SPECIFIED AS WITH PSYCHOTIC BEHAVIOR | → | F312   |
| 29645                    | BIPOLAR I DISORDER, MOST RECENT EPISODE (OR CURRENT) MANIC IN PARTIAL OR UNSPECIFIED REMISSION                | → | F3173  |
| 29646                    | BIPOLAR I DISORDER, MOST RECENT EPISODE (OR CURRENT) MANIC IN FULL REMISSION                                  | → | F3174  |
| <b>Bipolar depressed</b> |                                                                                                               |   |        |
| 29650                    | BIPOLAR I DISORDER, MOST RECENT EPISODE (OR CURRENT) DEPRESSED UNSPECIFIED DEGREE                             | → | F3130  |

|                            |                                                                                                                     |   |       |
|----------------------------|---------------------------------------------------------------------------------------------------------------------|---|-------|
| 29651                      | BIPOLAR I DISORDER, MOST RECENT EPISODE (OR CURRENT) DEPRESSED MILD DEGREE                                          | → | F3131 |
| 29652                      | BIPOLAR I DISORDER, MOST RECENT EPISODE (OR CURRENT) DEPRESSED MODERATE DEGREE                                      | → | F312  |
| 29653                      | BIPOLAR I DISORDER, MOST RECENT EPISODE (OR CURRENT) DEPRESSED SEVERE DEGREE, WITHOUT MENTION OF PSYCHOTIC BEHAVIOR | → | F314  |
| 29654                      | BIPOLAR I DISORDER, MOST RECENT EPISODE (OR CURRENT) DEPRESSED SEVERE DEGREE SPECIFIED AS WITH PSYCHOTIC BEHAVIOR   | → | F315  |
| 29655                      | BIPOLAR I DISORDER, MOST RECENT EPISODE (OR CURRENT) DEPRESSED IN PARTIAL OR UNSPECIFIED REMISSION                  | → | F3175 |
| 29656                      | BIPOLAR I DISORDER, MOST RECENT EPISODE (OR CURRENT) DEPRESSED IN REMISSION                                         | → | F3176 |
| <b>Bipolar mixed</b>       |                                                                                                                     |   |       |
| 29660                      | BIPOLAR I DISORDER, MOST RECENT EPISODE (OR CURRENT) MIXED UNSPECIFIED DEGREE                                       | → | F3160 |
| 29661                      | BIPOLAR I DISORDER, MOST RECENT EPISODE (OR CURRENT) MIXED MILD DEGREE                                              | → | F3161 |
| 29662                      | BIPOLAR I DISORDER, MOST RECENT EPISODE (OR CURRENT) MIXED MODERATE DEGREE                                          | → | F3162 |
| 29663                      | BIPOLAR I DISORDER, MOST RECENT EPISODE (OR CURRENT) MIXED, SEVERE DEGREE WITHOUT MENTION OF PSYCHOTIC BEHAVIOR     | → | F3163 |
| 29664                      | BIPOLAR I DISORDER, MOST RECENT EPISODE (OR CURRENT) MIXED SEVERE DEGREE SPECIFIED AS WITH PSYCHOTIC BEHAVIOR       | → | F3164 |
| 29665                      | BIPOLAR I DISORDER, MOST RECENT EPISODE (OR CURRENT) MIXED IN PARTIAL OR UNSPECIFIED REMISSION                      | → | F3177 |
| 29666                      | BIPOLAR I DISORDER, MOST RECENT EPISODE (OR CURRENT) MIXED IN FULL REMISSION                                        | → | F3178 |
| <b>Bipolar unspecified</b> |                                                                                                                     |   |       |
| 2967                       | BIPOLAR I DISORDER, MOST RECENT EPISODE (OR CURRENT) UNSPECIFIED                                                    | → | F319  |
| 29680                      | BIPOLAR DISORDER, UNSPECIFIED                                                                                       | → | F319  |
| 29689                      | BIPOLAR DISORDER, OTHER                                                                                             | → | F3181 |

**TABLE S2.** ICD-9 and ICD-10 codes for psychiatric co-morbidities

| Comorbidity                    | ICD-9-CM | ICD-9-CM Description                                                  |        | ICD-10 |
|--------------------------------|----------|-----------------------------------------------------------------------|--------|--------|
| <b>Anxiety disorder</b>        |          |                                                                       |        |        |
| Generalized anxiety disorder   | 30002    | GENERALIZED ANXIETY DISORDER                                          | →      | F411   |
| Panic disorder                 | 30001    | PANIC DISORDER WITHOUT AGORAPHOBIA                                    | →      | F410   |
| Phobia                         | 30020    | PHOBIA UNSPECIFIED                                                    | →      | F409   |
|                                | 30021    | AGORAPHOBIA WITH PANIC DISORDER                                       | →      | F4001  |
|                                | 30022    | AGORAPHOBIA WITHOUT PANIC ATTACKS                                     | →      | F4002  |
|                                | 30023    | SOCIAL PHOBIA                                                         | →      | F4010  |
|                                | 30029    | OTHER ISOLATED OR SPECIFIC PHOBIAS                                    | →      | F40218 |
|                                |          |                                                                       | →      | F40240 |
| →                              |          |                                                                       | F40241 |        |
| Post-traumatic stress disorder | 30981    | POSTTRAUMATIC STRESS DISORDER                                         | →      | F4310  |
|                                |          |                                                                       | →      | F4312  |
| Other                          | 30000    | ANXIETY STATE UNSPECIFIED                                             | →      | F419   |
|                                | 30009    | OTHER ANXIETY STATES                                                  | →      | F418   |
|                                | 29384    | ANXIETY DISORDER IN CONDITIONS CLASSIFIED ELSEWHERE                   | →      | F064   |
|                                | 3003     | OBSESSIVE-COMPULSIVE DISORDERS                                        | →      | F42    |
| <b>Psychotic disorder</b>      |          |                                                                       |        |        |
| Schizophreniform disorder      | 29540    | ACUTE SCHIZOPHRENIC EPISODE UNSPECIFIED STATE                         | →      | F2081  |
|                                | 29541    | ACUTE SCHIZOPHRENIC EPISODE SUBCHRONIC STATE                          |        |        |
|                                | 29542    | ACUTE SCHIZOPHRENIC EPISODE CHRONIC STATE                             |        |        |
|                                | 29543    | ACUTE SCHIZOPHRENIC EPISODE SUBCHRONIC STATE WITH ACUTE EXACERBATION  |        |        |
|                                | 29544    | ACUTE SCHIZOPHRENIC EPISODE CHRONIC STATE WITH ACUTE EXACERBATION     |        |        |
|                                | 29545    | ACUTE SCHIZOPHRENIC EPISODE IN REMISSION                              |        |        |
| Catatonic schizophrenia        | 29520    | CATATONIC TYPE SCHIZOPHRENIA UNSPECIFIED STATE                        | →      | F202   |
|                                | 29521    | CATATONIC TYPE SCHIZOPHRENIA SUBCHRONIC STATE                         |        |        |
|                                | 29522    | CATATONIC TYPE SCHIZOPHRENIA CHRONIC STATE                            |        |        |
|                                | 29523    | CATATONIC TYPE SCHIZOPHRENIA SUBCHRONIC STATE WITH ACUTE EXACERBATION |        |        |
|                                | 29524    | CATATONIC TYPE SCHIZOPHRENIA CHRONIC STATE WITH ACUTE EXACERBATION    |        |        |

|                            |       |                                                                          |   |      |
|----------------------------|-------|--------------------------------------------------------------------------|---|------|
|                            | 29525 | CATATONIC TYPE SCHIZOPHRENIA IN REMISSION                                |   |      |
| Disorganized schizophrenia | 29510 | DISORGANIZED TYPE SCHIZOPHRENIA UNSPECIFIED STATE                        | → | F201 |
|                            | 29511 | DISORGANIZED TYPE SCHIZOPHRENIA SUBCHRONIC STATE                         |   |      |
|                            | 29512 | DISORGANIZED TYPE SCHIZOPHRENIA CHRONIC STATE                            |   |      |
|                            | 29513 | DISORGANIZED TYPE SCHIZOPHRENIA SUBCHRONIC STATE WITH ACUTE EXACERBATION |   |      |
|                            | 29514 | DISORGANIZED TYPE SCHIZOPHRENIA CHRONIC STATE WITH ACUTE EXACERBATION    |   |      |
|                            | 29515 | DISORGANIZED TYPE SCHIZOPHRENIA IN REMISSION                             |   |      |
| Paranoid schizophrenia     | 29530 | PARANOID TYPE SCHIZOPHRENIA UNSPECIFIED STATE                            | → | F200 |
|                            | 29531 | PARANOID TYPE SCHIZOPHRENIA SUBCHRONIC STATE                             |   |      |
|                            | 29532 | PARANOID TYPE SCHIZOPHRENIA CHRONIC STATE                                |   |      |
|                            | 29533 | PARANOID TYPE SCHIZOPHRENIA SUBCHRONIC STATE WITH ACUTE EXACERBATION     |   |      |
|                            | 29534 | PARANOID TYPE SCHIZOPHRENIA CHRONIC STATE WITH ACUTE EXACERBATION        |   |      |
|                            | 29535 | PARANOID TYPE SCHIZOPHRENIA IN REMISSION                                 |   |      |
| Residual schizophrenia     | 29560 | RESIDUAL SCHIZOPHRENIA UNSPECIFIED STATE                                 | → | F205 |
|                            | 29561 | RESIDUAL SCHIZOPHRENIA SUBCHRONIC STATE                                  |   |      |
|                            | 29562 | RESIDUAL SCHIZOPHRENIA CHRONIC STATE                                     |   |      |
|                            | 29563 | RESIDUAL SCHIZOPHRENIA SUBCHRONIC STATE WITH ACUTE EXACERBATION          |   |      |
|                            | 29564 | RESIDUAL SCHIZOPHRENIA CHRONIC STATE WITH ACUTE EXACERBATION             |   |      |
|                            | 29565 | RESIDUAL SCHIZOPHRENIA IN REMISSION                                      |   |      |
| Unspecified schizophrenia  | 29590 | UNSPECIFIED TYPE SCHIZOPHRENIA UNSPECIFIED STATE                         | → | F209 |
|                            | 29591 | UNSPECIFIED TYPE SCHIZOPHRENIA SUBCHRONIC STATE                          |   |      |
|                            | 29592 | UNSPECIFIED TYPE SCHIZOPHRENIA CHRONIC STATE                             |   |      |
|                            | 29593 | UNSPECIFIED TYPE SCHIZOPHRENIA SUBCHRONIC STATE WITH ACUTE EXACERBATION  |   |      |
|                            | 29594 | UNSPECIFIED TYPE SCHIZOPHRENIA CHRONIC STATE WITH ACUTE EXACERBATION     |   |      |
|                            | 29595 | UNSPECIFIED TYPE SCHIZOPHRENIA IN REMISSION                              |   |      |
| Schizoaffective disorder   | 29570 | SCHIZO-AFFECTIVE TYPE SCHIZOPHRENIA UNSPECIFIED STATE                    | → | F259 |
|                            | 29571 | SCHIZO-AFFECTIVE TYPE SCHIZOPHRENIA SUBCHRONIC STATE                     |   |      |

|                     |                                                                              |                                                                                 |   |       |
|---------------------|------------------------------------------------------------------------------|---------------------------------------------------------------------------------|---|-------|
|                     | 29572                                                                        | SCHIZO-AFFECTIVE TYPE SCHIZOPHRENIA CHRONIC STATE                               |   |       |
|                     | 29573                                                                        | SCHIZO-AFFECTIVE TYPE SCHIZOPHRENIA SUBCHRONIC STATE WITH ACUTE EXACERBATION    |   |       |
|                     | 29574                                                                        | SCHIZO-AFFECTIVE TYPE SCHIZOPHRENIA CHRONIC STATE WITH ACUTE EXACERBATION       |   |       |
|                     | 29575                                                                        | SCHIZO-AFFECTIVE TYPE SCHIZOPHRENIA IN REMISSION                                |   |       |
| Other schizophrenia | 29500                                                                        | SIMPLE TYPE SCHIZOPHRENIA UNSPECIFIED STATE                                     | → | F2089 |
|                     | 29501                                                                        | SIMPLE TYPE SCHIZOPHRENIA SUBCHRONIC STATE                                      |   |       |
|                     | 29502                                                                        | SIMPLE TYPE SCHIZOPHRENIA CHRONIC STATE                                         |   |       |
|                     | 29503                                                                        | SIMPLE TYPE SCHIZOPHRENIA SUBCHRONIC STATE WITH ACUTE EXACERBATION              |   |       |
|                     | 29504                                                                        | SIMPLE TYPE SCHIZOPHRENIA CHRONIC STATE WITH ACUTE EXACERBATION                 |   |       |
|                     | 29505                                                                        | SIMPLE TYPE SCHIZOPHRENIA IN REMISSION                                          |   |       |
|                     | 29550                                                                        | LATENT SCHIZOPHRENIA UNSPECIFIED STATE                                          |   |       |
|                     | 29551                                                                        | LATENT SCHIZOPHRENIA SUBCHRONIC STATE                                           |   |       |
|                     | 29552                                                                        | LATENT SCHIZOPHRENIA CHRONIC STATE                                              |   |       |
|                     | 29553                                                                        | LATENT SCHIZOPHRENIA SUBCHRONIC STATE WITH ACUTE EXACERBATION                   |   |       |
|                     | 29554                                                                        | LATENT SCHIZOPHRENIA CHRONIC STATE WITH ACUTE EXACERBATION                      |   |       |
|                     | 29555                                                                        | LATENT SCHIZOPHRENIA IN REMISSION                                               |   |       |
|                     | 29580                                                                        | OTHER SPECIFIED TYPES OF SCHIZOPHRENIA UNSPECIFIED STATE                        |   |       |
|                     | 29581                                                                        | OTHER SPECIFIED TYPES OF SCHIZOPHRENIA SUBCHRONIC STATE                         |   |       |
|                     | 29582                                                                        | OTHER SPECIFIED TYPES OF SCHIZOPHRENIA CHRONIC STATE                            |   |       |
|                     | 29583                                                                        | OTHER SPECIFIED TYPES OF SCHIZOPHRENIA SUBCHRONIC STATE WITH ACUTE EXACERBATION |   |       |
| 29584               | OTHER SPECIFIED TYPES OF SCHIZOPHRENIA CHRONIC STATE WITH ACUTE EXACERBATION |                                                                                 |   |       |
| 29585               | OTHER SPECIFIED TYPES OF SCHIZOPHRENIA IN REMISSION                          |                                                                                 |   |       |
| Psychosis           | 2970                                                                         | DELUSIONAL DISORDER                                                             | → | F22   |
|                     | 2971                                                                         |                                                                                 |   |       |
|                     | 2972                                                                         |                                                                                 |   |       |
|                     | 2978                                                                         |                                                                                 |   |       |

|                               |       |                                                                                  |   |                                                                                                  |
|-------------------------------|-------|----------------------------------------------------------------------------------|---|--------------------------------------------------------------------------------------------------|
|                               | 2981  | OTHER PSYCHOTIC DISORDER NOT DUE TO A SUBSTANCE OR KNOWN PHYSIOLOGICAL CONDITION |   | F28                                                                                              |
|                               | 2979  | BRIEF PSYCHOTIC DISORDER                                                         | → | F23                                                                                              |
|                               | 2983  |                                                                                  |   |                                                                                                  |
|                               | 2984  |                                                                                  |   |                                                                                                  |
|                               | 2988  |                                                                                  |   |                                                                                                  |
|                               | 2989  | UNSPECIFIED PSYCHOSIS                                                            | → | F29                                                                                              |
|                               | 2973  | SHARED PSYCHOTIC DISORDER                                                        | → | F24                                                                                              |
|                               | 29381 | PSYCHOTIC DISORDER WITH DELUSIONS IN CONDITIONS CLASSIFIED ELSEWHERE             | → | F062                                                                                             |
|                               | 29382 | PSYCHOTIC DISORDER WITH HALLUCINATIONS IN CONDITIONS CLASSIFIED ELSEWHERE        | → | F060                                                                                             |
| <b>Substance use disorder</b> |       |                                                                                  |   |                                                                                                  |
| Alcohol-related               | 2910  | ALCOHOL WITHDRAWAL DELIRIUM                                                      | → | F10231                                                                                           |
|                               | 2911  | ALCOHOL-INDUCED PERSISTING AMNESTIC DISORDER                                     | → | F1096                                                                                            |
|                               | 2912  | ALCOHOL-INDUCED PERSISTING DEMENTIA                                              | → | F1027                                                                                            |
|                               | 2913  | ALCOHOL-INDUCED PSYCHOTIC DISORDER WITH HALLUCINATIONS                           | → | F10951                                                                                           |
|                               | 2914  | IDIOSYNCRATIC ALCOHOL INTOXICATION                                               | → | F10929                                                                                           |
|                               | 2915  | ALCOHOL-INDUCED PSYCHOTIC DISORDER WITH DELUSIONS                                | → | F10950                                                                                           |
|                               | 29181 | ALCOHOL WITHDRAWAL                                                               | → | F10239                                                                                           |
|                               | 29182 | ALCOHOL INDUCED SLEEP DISORDERS                                                  | → | F10182<br>F10282<br>F10982                                                                       |
|                               | 29189 | OTHER SPECIFIED ALCOHOL-INDUCED MENTAL DISORDERS                                 | → | F10159<br>F10180<br>F10181<br>F10188<br>F10259<br>F10280<br>F10281<br>F10288<br>F10959<br>F10980 |
|                               | 2919  | UNSPECIFIED ALCOHOL-INDUCED MENTAL DISORDERS                                     | → | F1099                                                                                            |

|              |       |                                                                          |   |        |
|--------------|-------|--------------------------------------------------------------------------|---|--------|
|              | 30300 | ACUTE ALCOHOLIC INTOXICATION IN ALCOHOLISM UNSPECIFIED DRINKING BEHAVIOR |   |        |
|              | 30301 | ACUTE ALCOHOLIC INTOXICATION IN ALCOHOLISM CONTINUOUS DRINKING BEHAVIOR  | → | F10229 |
|              | 30302 | ACUTE ALCOHOLIC INTOXICATION IN ALCOHOLISM EPISODIC DRINKING BEHAVIOR    |   |        |
|              | 30303 | ACUTE ALCOHOLIC INTOXICATION IN ALCOHOLISM IN REMISSION                  |   |        |
|              | 30390 | OTHER AND UNSPECIFIED ALCOHOL DEPENDENCE UNSPECIFIED DRINKING BEHAVIOR   |   |        |
|              | 30391 | OTHER AND UNSPECIFIED ALCOHOL DEPENDENCE CONTINUOUS DRINKING BEHAVIOR    | → | F1020  |
|              | 30392 | OTHER AND UNSPECIFIED ALCOHOL DEPENDENCE EPISODIC DRINKING BEHAVIOR      |   |        |
|              | 30393 | OTHER AND UNSPECIFIED ALCOHOL DEPENDENCE IN REMISSION                    |   |        |
|              | 30500 | NONDEPENDENT ALCOHOL ABUSE UNSPECIFIED DRINKING BEHAVIOR                 |   |        |
|              | 30501 | NONDEPENDENT ALCOHOL ABUSE CONTINUOUS DRINKING BEHAVIOR                  | → | F1010  |
|              | 30502 | NONDEPENDENT ALCOHOL ABUSE EPISODIC DRINKING BEHAVIOR                    |   |        |
|              | 30503 | NONDEPENDENT ALCOHOL ABUSE IN REMISSION                                  |   |        |
|              | 3575  | ALCOHOLIC POLYNEUROPATHY                                                 | → | G621   |
|              | 4255  | ALCOHOLIC CARDIOMYOPATHY                                                 | → | I426   |
|              | 53530 | ALCOHOLIC GASTRITIS (WITHOUT HEMORRHAGE)                                 | → | K2920  |
|              | 53531 | ALCOHOLIC GASTRITIS WITH HEMORRHAGE                                      | → | K2921  |
|              | 5710  | ALCOHOLIC FATTY LIVER                                                    | → | K700   |
|              | 5711  | ACUTE ALCOHOLIC HEPATITIS                                                | → | K7010  |
|              | 5712  | ALCOHOLIC CIRRHOSIS OF LIVER                                             | → | K7030  |
|              | 5713  | ALCOHOLIC LIVER DAMAGE UNSPECIFIED                                       | → | K709   |
| Amphetamines | 30440 | AMPHETAMINE AND OTHER PSYCHOSTIMULANT DEPENDENCE UNSPECIFIED USE         |   |        |
|              | 30441 | AMPHETAMINE AND OTHER PSYCHOSTIMULANT DEPENDENCE CONTINUOUS USE          | → | F1520  |
|              | 30442 | AMPHETAMINE AND OTHER PSYCHOSTIMULANT DEPENDENCE EPISODIC USE            |   |        |
|              | 30443 | AMPHETAMINE AND OTHER PSYCHOSTIMULANT DEPENDENCE IN REMISSION            | → | F1521  |



|                               |       |                                                                                  |                       |                   |
|-------------------------------|-------|----------------------------------------------------------------------------------|-----------------------|-------------------|
|                               | 30570 | NONDEPENDENT AMPHETAMINE OR RELATED ACTING SYMPATHOMIMETIC ABUSE UNSPECIFIED USE |                       |                   |
|                               | 30571 | NONDEPENDENT AMPHETAMINE OR RELATED ACTING SYMPATHOMIMETIC ABUSE CONTINUOUS USE  | →                     | F1510             |
|                               | 30572 | NONDEPENDENT AMPHETAMINE OR RELATED ACTING SYMPATHOMIMETIC ABUSE EPISODIC USE    |                       |                   |
|                               | 30573 | NONDEPENDENT AMPHETAMINE OR RELATED ACTING SYMPATHOMIMETIC ABUSE IN REMISSION    |                       |                   |
|                               | 30430 | CANNABIS DEPENDENCE UNSPECIFIED USE                                              |                       |                   |
| Cannabis                      | 30431 | CANNABIS DEPENDENCE CONTINUOUS USE                                               | →                     | F1220             |
|                               | 30432 | CANNABIS DEPENDENCE EPISODIC USE                                                 |                       |                   |
|                               | 30433 | CANNABIS DEPENDENCE IN REMISSION                                                 | →                     | F1210             |
|                               | 30520 | NONDEPENDENT CANNABIS ABUSE UNSPECIFIED USE                                      |                       |                   |
|                               | 30521 | NONDEPENDENT CANNABIS ABUSE CONTINUOUS USE                                       | →                     | F1210 or<br>F1290 |
|                               | 30522 | NONDEPENDENT CANNABIS ABUSE EPISODIC USE                                         |                       |                   |
|                               | 30523 | NONDEPENDENT CANNABIS ABUSE IN REMISSION                                         |                       |                   |
|                               |       | 9696                                                                             | POISONING BY CANNABIS | →                 |
| Cocaine                       | 30420 | COCAINE DEPENDENCE UNSPECIFIED USE                                               |                       |                   |
|                               | 30421 | COCAINE DEPENDENCE CONTINUOUS USE                                                | →                     | F1420             |
|                               | 30422 | COCAINE DEPENDENCE EPISODIC USE                                                  |                       |                   |
|                               | 30423 | COCAINE DEPENDENCE IN REMISSION                                                  |                       |                   |
|                               | 30560 | NONDEPENDENT COCAINE ABUSE UNSPECIFIED USE                                       |                       |                   |
|                               | 30561 | NONDEPENDENT COCAINE ABUSE CONTINUOUS USE                                        | →                     | F1410             |
|                               | 30562 | NONDEPENDENT COCAINE ABUSE EPISODIC USE                                          |                       |                   |
|                               | 30563 | NONDEPENDENT COCAINE ABUSE IN REMISSION                                          |                       |                   |
|                               |       | 97081                                                                            | POISONING BY COCAINE  | →                 |
| Drug-induced mental disorders | 2920  | DRUG WITHDRAWAL                                                                  | →                     | F19939            |
|                               | 29211 | DRUG-INDUCED PSYCHOTIC DISORDER WITH DELUSIONS                                   | →                     | F19950            |
|                               | 29212 | DRUG-INDUCED PSYCHOTIC DISORDER WITH HALLUCINATIONS                              | →                     | F19951            |

|  |       |                                               |   |                                                                                                                                                    |
|--|-------|-----------------------------------------------|---|----------------------------------------------------------------------------------------------------------------------------------------------------|
|  | 2922  | PATHOLOGICAL DRUG INTOXICATION                | → | F15920                                                                                                                                             |
|  | 29281 | DRUG-INDUCED DELIRIUM                         | → | F19921                                                                                                                                             |
|  | 29282 | DRUG-INDUCED PERSISTING DEMENTIA              | → | F1997                                                                                                                                              |
|  | 29283 | DRUG-INDUCED PERSISTING AMNESTIC DISORDER     | → | F1996                                                                                                                                              |
|  | 29284 | DRUG-INDUCED MOOD DISORDER                    | → | F1994                                                                                                                                              |
|  | 29285 | DRUG INDUCED SLEEP DISORDERS                  | → | F11182<br>F11282<br>F11982<br>F13182<br>F13282<br>F13982<br>F14182<br>F14282<br>F14982<br>F15182<br>F15282<br>F15982<br>F19182<br>F19282<br>F19982 |
|  | 29289 | OTHER SPECIFIED DRUG-INDUCED MENTAL DISORDERS | → | F11159<br>F11181<br>F11188<br>F11222<br>F11259<br>F11281<br>F11288<br>F11922<br>F11959<br>F11981<br>F11988<br>F12122<br>F12159<br>F12180<br>F12188 |

|  |  |  |        |
|--|--|--|--------|
|  |  |  | F12222 |
|  |  |  | F12259 |
|  |  |  | F12280 |
|  |  |  | F12288 |
|  |  |  | F12922 |
|  |  |  | F12959 |
|  |  |  | F12980 |
|  |  |  | F12988 |
|  |  |  | F13159 |
|  |  |  | F13180 |
|  |  |  | F13181 |
|  |  |  | F13188 |
|  |  |  | F13259 |
|  |  |  | F13280 |
|  |  |  | F13281 |
|  |  |  | F13288 |
|  |  |  | F13959 |
|  |  |  | F13980 |
|  |  |  | F13981 |
|  |  |  | F13988 |
|  |  |  | F14122 |
|  |  |  | F14159 |
|  |  |  | F14180 |
|  |  |  | F14181 |
|  |  |  | F14188 |
|  |  |  | F14222 |
|  |  |  | F14259 |
|  |  |  | F14280 |
|  |  |  | F14281 |
|  |  |  | F14288 |
|  |  |  | F14922 |
|  |  |  | F14959 |
|  |  |  | F14980 |
|  |  |  | F14981 |
|  |  |  | F14988 |

|  |  |  |        |
|--|--|--|--------|
|  |  |  | F15122 |
|  |  |  | F15159 |
|  |  |  | F15180 |
|  |  |  | F15181 |
|  |  |  | F15188 |
|  |  |  | F15222 |
|  |  |  | F15259 |
|  |  |  | F15280 |
|  |  |  | F15281 |
|  |  |  | F15288 |
|  |  |  | F15922 |
|  |  |  | F15959 |
|  |  |  | F15980 |
|  |  |  | F15981 |
|  |  |  | F15988 |
|  |  |  | F16122 |
|  |  |  | F16159 |
|  |  |  | F16180 |
|  |  |  | F16183 |
|  |  |  | F16188 |
|  |  |  | F16259 |
|  |  |  | F16280 |
|  |  |  | F16283 |
|  |  |  | F16288 |
|  |  |  | F16959 |
|  |  |  | F16980 |
|  |  |  | F16983 |
|  |  |  | F16988 |
|  |  |  | F17208 |
|  |  |  | F17218 |
|  |  |  | F17228 |
|  |  |  | F17298 |
|  |  |  | F18159 |
|  |  |  | F18180 |
|  |  |  | F18188 |

|               |       |                                                 |   |         |
|---------------|-------|-------------------------------------------------|---|---------|
|               |       |                                                 |   | F18259  |
|               |       |                                                 |   | F18280  |
|               |       |                                                 |   | F18288  |
|               |       |                                                 |   | F18959  |
|               |       |                                                 |   | F18980  |
|               |       |                                                 |   | F18988  |
|               |       |                                                 |   | F19122  |
|               |       |                                                 |   | F19159  |
|               |       |                                                 |   | F19180  |
|               |       |                                                 |   | F19181  |
|               |       |                                                 |   | F19188  |
|               |       |                                                 |   | F19222  |
|               |       |                                                 |   | F19259  |
|               |       |                                                 |   | F19280  |
|               |       |                                                 |   | F19281  |
|               |       |                                                 |   | F19288  |
|               |       |                                                 |   | F19922  |
|               |       |                                                 |   | F19959  |
|               |       |                                                 |   | F19980  |
|               |       |                                                 |   | F19981  |
|               |       |                                                 |   | F19988  |
|               | 2929  | UNSPECIFIED DRUG-INDUCED MENTAL DISORDER        | → | F1999   |
| Hallucinogens | 30450 | HALLUCINOGEN DEPENDENCE UNSPECIFIED USE         |   |         |
|               | 30451 | HALLUCINOGEN DEPENDENCE CONTINUOUS USE          | → | F1620   |
|               | 30452 | HALLUCINOGEN DEPENDENCE EPISODIC USE            |   |         |
|               | 30453 | HALLUCINOGEN DEPENDENCE IN REMISSION            | → | F1621   |
|               | 30530 | NONDEPENDENT HALLUCINOGEN ABUSE UNSPECIFIED USE |   |         |
|               | 30531 | NONDEPENDENT HALLUCINOGEN ABUSE CONTINUOUS USE  | → | F1610   |
|               | 30532 | NONDEPENDENT HALLUCINOGEN ABUSE EPISODIC USE    |   |         |
|               | 30533 | NONDEPENDENT HALLUCINOGEN ABUSE IN REMISSION    |   |         |
|               | 9696  | POISONING BY PSYCHODYSLEPTICS (HALLUCINOGENS)   | → | T40901A |
|               |       |                                                 |   | T40902A |
|               |       |                                                 |   | T40903A |
|               |       |                                                 |   | T40904A |
|               |       |                                                 |   | T40991A |

|         |       |                                                                                 |   |                                                |
|---------|-------|---------------------------------------------------------------------------------|---|------------------------------------------------|
|         |       |                                                                                 |   | T40992A<br>T40993A<br>T40994A                  |
| Opioids | 30400 | OPIOID TYPE DEPENDENCE UNSPECIFIED USE                                          |   |                                                |
|         | 30401 | OPIOID TYPE DEPENDENCE CONTINUOUS USE                                           | → | F1120                                          |
|         | 30402 | OPIOID TYPE DEPENDENCE EPISODIC USE                                             |   |                                                |
|         | 30403 | OPIOID TYPE DEPENDENCE IN REMISSION                                             | → | F1121                                          |
|         | 30470 | COMBINATIONS OF OPIOID TYPE DRUG WITH ANY OTHER DRUG DEPENDENCE UNSPECIFIED USE |   |                                                |
|         | 30471 | COMBINATIONS OF OPIOID TYPE DRUG WITH ANY OTHER DRUG DEPENDENCE CONTINUOUS USE  | → | F1920                                          |
|         | 30472 | COMBINATIONS OF OPIOID TYPE DRUG WITH ANY OTHER DRUG DEPENDENCE EPISODIC USE    |   |                                                |
|         | 30473 | COMBINATIONS OF OPIOID TYPE DRUG WITH ANY OTHER DRUG DEPENDENCE IN REMISSION    | → | F1921                                          |
|         | 30550 | NONDEPENDENT OPIOID ABUSE UNSPECIFIED USE                                       |   |                                                |
|         | 30551 | NONDEPENDENT OPIOID ABUSE CONTINUOUS USE                                        |   |                                                |
|         | 30552 | NONDEPENDENT OPIOID ABUSE EPISODIC USE                                          | → | F1110                                          |
|         | 30553 | NONDEPENDENT OPIOID ABUSE IN REMISSION                                          |   |                                                |
|         | 96500 | POISONING BY OPIUM (ALKALOIDS) UNSPECIFIED                                      | → | T400X1A<br>T400X2A<br>T400X3A<br>T400X4A       |
|         | 96501 | POISONING BY HEROIN                                                             | → | T401X1A<br>T401X2A<br>T401X3A<br>T401X4A       |
|         | 96502 | POISONING BY METHADONE                                                          | → | T403X1A<br>T403X2A<br>T403X3A<br>T403X4A       |
|         | 96509 | POISONING BY OTHER OPIATES AND RELATED NARCOTICS                                | → | T402X1A<br>→ T402X2A<br>→ T402X3A<br>→ T402X4A |

|                                                                      |       |                                                                            |   |         |
|----------------------------------------------------------------------|-------|----------------------------------------------------------------------------|---|---------|
|                                                                      |       |                                                                            | → | T404X1A |
|                                                                      |       |                                                                            | → | T404X2A |
|                                                                      |       |                                                                            | → | T404X3A |
|                                                                      |       |                                                                            | → | T404X4A |
|                                                                      |       |                                                                            | → | T40601A |
|                                                                      |       |                                                                            | → | T40602A |
|                                                                      |       |                                                                            | → | T40603A |
|                                                                      |       |                                                                            | → | T40604A |
|                                                                      |       |                                                                            | → | T40691A |
|                                                                      |       |                                                                            | → | T40692A |
|                                                                      |       |                                                                            | → | T40693A |
|                                                                      |       |                                                                            | → | T40694A |
| Sedatives, hypnotics, anxiolytics,<br>tranquilizers, or barbiturates | 30410 | SEDATIVE, HYPNOTIC OR ANXIOLYTIC DEPENDENCE UNSPECIFIED USE                |   |         |
|                                                                      | 30411 | SEDATIVE, HYPNOTIC OR ANXIOLYTIC DEPENDENCE CONTINUOUS USE                 | → | F1320   |
|                                                                      | 30412 | SEDATIVE, HYPNOTIC OR ANXIOLYTIC DEPENDENCE EPISODIC USE                   |   |         |
|                                                                      | 30413 | SEDATIVE, HYPNOTIC OR ANXIOLYTIC DEPENDENCE IN REMISSION                   | → | F1321   |
|                                                                      | 30540 | NONDEPENDENT SEDATIVE, HYPNOTIC, OR ANXIOLYTIC ABUSE, UNSPECIFIED USE      |   |         |
|                                                                      | 30541 | NONDEPENDENT SEDATIVE, HYPNOTIC, OR ANXIOLYTIC ABUSE, CONTINUOUS USE       | → | F1310   |
|                                                                      | 30542 | NONDEPENDENT SEDATIVE, HYPNOTIC, OR ANXIOLYTIC ABUSE, EPISODIC USE         |   |         |
|                                                                      | 30543 | NONDEPENDENT SEDATIVE, HYPNOTIC, OR ANXIOLYTIC ABUSE, IN REMISSION         |   |         |
| Other                                                                | 30460 | OTHER SPECIFIED DRUG DEPENDENCE UNSPECIFIED USE                            |   |         |
|                                                                      | 30461 | OTHER SPECIFIED DRUG DEPENDENCE CONTINUOUS USE                             | → | F1920   |
|                                                                      | 30462 | OTHER SPECIFIED DRUG DEPENDENCE EPISODIC USE                               |   |         |
|                                                                      | 30463 | OTHER SPECIFIED DRUG DEPENDENCE IN REMISSION                               |   |         |
|                                                                      | 30480 | COMBINATIONS OF DRUG DEPENDENCE EXCLUDING OPIOID TYPE DRUG UNSPECIFIED USE | → | F1920   |
|                                                                      | 30481 | COMBINATIONS OF DRUG DEPENDENCE EXCLUDING OPIOID TYPE DRUG CONTINUOUS USE  |   |         |

|                              |       |                                                                                                                       |   |                                      |
|------------------------------|-------|-----------------------------------------------------------------------------------------------------------------------|---|--------------------------------------|
|                              | 30482 | COMBINATIONS OF DRUG DEPENDENCE EXCLUDING OPIOID TYPE<br>DRUG EPISODIC USE                                            |   |                                      |
|                              | 30483 | COMBINATIONS OF DRUG DEPENDENCE EXCLUDING OPIOID TYPE<br>DRUG IN REMISSION                                            |   |                                      |
|                              | 30490 | UNSPECIFIED DRUG DEPENDENCE UNSPECIFIED USE                                                                           |   |                                      |
|                              | 30491 | UNSPECIFIED DRUG DEPENDENCE CONTINUOUS USE                                                                            | → | F1920                                |
|                              | 30492 | UNSPECIFIED DRUG DEPENDENCE EPISODIC USE                                                                              |   |                                      |
|                              | 30493 | UNSPECIFIED DRUG DEPENDENCE IN REMISSION                                                                              | → | F1921                                |
|                              | 30590 | NONDEPENDENT OTHER MIXED OR UNSPECIFIED DRUG ABUSE<br>UNSPECIFIED USE                                                 |   |                                      |
|                              | 30591 | NONDEPENDENT OTHER MIXED OR UNSPECIFIED DRUG ABUSE<br>CONTINUOUS USE                                                  | → | F1810                                |
|                              | 30592 | NONDEPENDENT OTHER MIXED OR UNSPECIFIED DRUG ABUSE<br>EPISODIC USE                                                    |   |                                      |
|                              | 30593 | NONDEPENDENT OTHER MIXED OR UNSPECIFIED DRUG ABUSE IN<br>REMISSION                                                    |   |                                      |
|                              | 64830 | DRUG DEPENDENCE OF MOTHER COMPLICATING PREGNANCY<br>CHILDBIRTH OR THE PUERPERIUM UNSPECIFIED AS TO EPISODE OF<br>CARE | → | O99320                               |
|                              | 64831 | DRUG DEPENDENCE OF MOTHER WITH DELIVERY                                                                               | → | O99321<br>O99322<br>O99323<br>O99324 |
|                              | 64832 | DRUG DEPENDENCE OF MOTHER WITH DELIVERY WITH<br>POSTPARTUM COMPLICATION                                               | → | O99325                               |
|                              | 64833 | ANTEPARTUM DRUG DEPENDENCE                                                                                            | → | O99321<br>O99322<br>O99323           |
|                              | 63834 | POSTPARTUM DRUG DEPENDENCE                                                                                            | → | O99325                               |
| <b>Other mental disorder</b> |       |                                                                                                                       |   |                                      |
|                              | 3010  | PARANOID PERSONALITY DISORDER                                                                                         | → | F600                                 |
|                              | 30110 | AFFECTIVE PERSONALITY DISORDER UNSPECIFIED                                                                            | → | F340                                 |
| Personality disorder         | 30111 | CHRONIC HYPOMANIC PERSONALITY DISORDER                                                                                | → | F6089                                |
|                              | 30112 | CHRONIC DEPRESSIVE PERSONALITY DISORDER                                                                               | → | F341                                 |
|                              | 30113 | CYCLOTHYMIC DISORDER                                                                                                  | → | F340                                 |



|          |       |                                                   |   |                 |
|----------|-------|---------------------------------------------------|---|-----------------|
|          | 30120 | SCHIZOID PERSONALITY DISORDER UNSPECIFIED         | → | F601            |
|          | 30121 | INTROVERTED PERSONALITY DISORDER                  | → | F601            |
|          | 30122 | SCHIZOTYPAL PERSONALITY DISORDER                  | → | F21             |
|          | 3013  | EXPLOSIVE PERSONALITY DISORDER                    | → | F603            |
|          | 3014  | OBSESSIVE-COMPULSIVE PERSONALITY DISORDER         | → | F605            |
|          | 30150 | HISTRIONIC PERSONALITY DISORDER UNSPECIFIED       | → | F604            |
|          | 30151 | CHRONIC FACTITIOUS ILLNESS WITH PHYSICAL SYMPTOMS | → | F6812           |
|          | 30159 | OTHER HISTRIONIC PERSONALITY DISORDER             | → | F604            |
|          | 3016  | DEPENDENT PERSONALITY DISORDER                    | → | F607            |
|          | 3017  | ANTISOCIAL PERSONALITY DISORDER                   | → | F602            |
|          | 30181 | NARCISSISTIC PERSONALITY DISORDER                 | → | F6081           |
|          | 30182 | AVOIDANT PERSONALITY DISORDER                     | → | F606            |
|          | 30183 | BORDERLINE PERSONALITY DISORDER                   | → | F603            |
|          | 30184 | PASSIVE-AGGRESSIVE PERSONALITY                    | → | F6089           |
|          | 30189 | OTHER PERSONALITY DISORDERS                       | → | F6089           |
|          | 3019  | UNSPECIFIED PERSONALITY DISORDER                  | → | F609            |
|          | 2900  | SENILE DEMENTIA UNCOMPLICATED                     | → | F0390           |
|          | 29010 | PRESENILE DEMENTIA UNCOMPLICATED                  | → | F0390           |
|          | 29011 | PRESENILE DEMENTIA WITH DELIRIUM                  | → | F0390           |
|          | 29012 | PRESENILE DEMENTIA WITH DELUSIONAL FEATURES       | → | F0390 or<br>F05 |
|          | 29013 | PRESENILE DEMENTIA WITH DEPRESSIVE FEATURES       | → | F0390           |
|          | 29020 | SENILE DEMENTIA WITH DELUSIONAL FEATURES          | → | F0390 or<br>F05 |
|          | 29021 | SENILE DEMENTIA WITH DEPRESSIVE FEATURES          | → | F0390           |
|          | 2903  | SENILE DEMENTIA WITH DELIRIUM                     | → | F0390 or<br>F05 |
|          | 29040 | VASCULAR DEMENTIA UNCOMPLICATED                   | → | F0150           |
|          | 29041 | VASCULAR DEMENTIA WITH DELIRIUM                   |   |                 |
|          | 29042 | VASCULAR DEMENTIA WITH DELUSIONS                  | → | F0151           |
|          | 29043 | VASCULAR DEMENTIA WITH DEPRESSED MOOD             |   |                 |
|          | 2908  | OTHER SPECIFIED SENILE PSYCHOTIC CONDITIONS       | → | F0390           |
|          | 2909  | UNSPECIFIED SENILE PSYCHOTIC CONDITION            | → | F0390           |
|          | 2912  | ALCOHOL-INDUCED PERSISTING DEMENTIA               | → | F1027           |
| Dementia |       |                                                   |   |                 |

|                           |       |                                                                            |   |       |
|---------------------------|-------|----------------------------------------------------------------------------|---|-------|
|                           | 29410 | DEMENTIA IN CONDITIONS CLASSIFIED ELSEWHERE WITHOUT BEHAVIORAL DISTURBANCE | → | F0280 |
|                           | 29411 | DEMENTIA IN CONDITIONS CLASSIFIED ELSEWHERE WITH BEHAVIORAL DISTURBANC     | → | F0281 |
|                           | 29420 | DEMENTIA, UNSPECIFIED, WITHOUT BEHAVIORAL DISTURBANCE                      | → | F0390 |
|                           | 29421 | DEMENTIA, UNSPECIFIED, WITH BEHAVIORAL DISTURBANCE                         | → | F0391 |
|                           | 3310  | ALZHEIMER'S DISEASE                                                        | → | G309  |
|                           | 33111 | PICK'S DISEASE                                                             | → | G3101 |
|                           | 33119 | OTHER FRONTOTEMPORAL DEMENTIA                                              | → | G3109 |
|                           | 33182 | DEMENTIA WITH LEWY BODIES                                                  | → | G3183 |
| Mild cognitive impairment | 33183 | MILD COGNITIVE IMPAIRMENT, SO STATED                                       | → | G3184 |

**TABLE S3.** Trends of medications prescribed during office-based visits to psychiatrists among patients with bipolar disorder by secular period and limiting to first six medications only, 1997-2016

| Sample size                                                    | 1997-2000          | 2001-2004          | 2005-2008          | 2009-2012            | 2013-2016            | Secular trends        |            |         |                                   |            |         |
|----------------------------------------------------------------|--------------------|--------------------|--------------------|----------------------|----------------------|-----------------------|------------|---------|-----------------------------------|------------|---------|
|                                                                | Unweighted visits  | Unweighted visits  | Unweighted visits  | Unweighted visits    | Unweighted visits    | Unadjusted odds ratio | 95% CI     | p-value | Adjusted odds ratio <sup>a)</sup> | 95% CI     | p-value |
| Unweighted visits                                              | 504                | 889                | 864                | 1,313                | 849                  |                       |            |         |                                   |            |         |
| Weighted visits (Row %)                                        | 467,057<br>(11.1%) | 753,228<br>(17.8%) | 867,632<br>(20.6%) | 1,074,923<br>(25.5%) | 1,059,311<br>(25.1%) |                       |            |         |                                   |            |         |
| Any antipsychotic                                              | 19.1               | 31.8               | 51.5               | 52.9                 | 51.7                 | 3.64                  | 2.60, 5.10 | <0.001  | 3.85                              | 2.77, 5.35 | <0.001  |
| First-generation antipsychotic                                 | 7.0                | 3.1                | 2.8                | 3.1                  | 1.7                  | 0.32                  | 0.16, 0.65 | 0.002   | 0.23                              | 0.11, 0.49 | <0.001  |
| Second-generation antipsychotic (SGA)                          | 12.4               | 29.3               | 49.5               | 51.3                 | 50.4                 | 4.46                  | 3.15, 6.32 | <0.001  | 4.88                              | 3.47, 6.87 | <0.001  |
| FDA-approved SGA                                               | 12.1               | 28.1               | 49.1               | 48.5                 | 49.1                 | 4.27                  | 3.00, 6.06 | <0.001  | 4.64                              | 3.28, 6.56 | <0.001  |
| Any mood stabilizer                                            | 62.3               | 50.3               | 28.5               | 23.4                 | 25.6                 | 0.19                  | 0.13, 0.27 | <0.001  | 0.18                              | 0.12, 0.26 | <0.001  |
| Lithium                                                        | 30.4               | 20.7               | 17.3               | 13.9                 | 17.3                 | 0.49                  | 0.31, 0.76 | 0.002   | 0.45                              | 0.28, 0.71 | 0.001   |
| Carbamazepine or valproic acid                                 | 35.4               | 24.8               | 7.6                | 7.4                  | 4.8                  | 0.07                  | 0.05, 0.11 | <0.001  | 0.07                              | 0.04, 0.11 | <0.001  |
| Lamotrigine                                                    | 2.1                | 9.7                | 5.8                | 3.9                  | 4.3                  | 0.65                  | 0.40, 1.07 | 0.088   | 0.65                              | 0.39, 1.07 | 0.093   |
| Other anticonvulsant                                           | 6.3                | 19.8               | 12.1               | 11.9                 | 12.2                 | 0.93                  | 0.60, 1.44 | 0.730   | 0.88                              | 0.56, 1.36 | 0.557   |
| Gabapentin                                                     | 6.0                | 9.0                | 3.9                | 3.9                  | 4.3                  | 0.47                  | 0.27, 0.83 | 0.009   | 0.42                              | 0.23, 0.75 | 0.003   |
| Oxcarbazepine                                                  | 0.0                | 5.7                | 4.5                | 3.3                  | 5.3                  | 1.85                  | 0.83, 4.13 | 0.134   | 1.82                              | 0.82, 4.03 | 0.143   |
| Topiramate                                                     | 0.3                | 5.7                | 4.4                | 4.9                  | 3.0                  | 1.16                  | 0.68, 1.99 | 0.578   | 1.23                              | 0.69, 2.17 | 0.484   |
| Any antidepressant                                             | 47.0               | 50.2               | 55.0               | 49.7                 | 56.8                 | 1.33                  | 0.97, 1.83 | 0.077   | 1.24                              | 0.88, 1.73 | 0.219   |
| Tricyclics or MAOI                                             | 6.2                | 3.5                | 3.1                | 2.2                  | 2.9                  | 0.44                  | 0.19, 1.05 | 0.066   | 0.36                              | 0.15, 0.84 | 0.018   |
| SSRI                                                           | 24.0               | 31.4               | 30.6               | 25.8                 | 25.3                 | 0.85                  | 0.62, 1.16 | 0.307   | 0.82                              | 0.60, 1.13 | 0.234   |
| SNRI                                                           | 4.5                | 6.6                | 13.7               | 12.9                 | 11.4                 | 2.15                  | 1.37, 3.37 | 0.001   | 1.97                              | 1.28, 3.03 | 0.002   |
| Other                                                          | 19.0               | 17.5               | 19.8               | 19.2                 | 29.0                 | 1.86                  | 1.24, 2.79 | 0.003   | 1.78                              | 1.14, 2.79 | 0.011   |
| Bupropion                                                      | 9.8                | 11.8               | 10.7               | 10.2                 | 12.1                 | 1.12                  | 0.73, 1.71 | 0.618   | 1.10                              | 0.70, 1.74 | 0.684   |
| Mirtazapine                                                    | 2.4                | 2.1                | 1.8                | 1.7                  | 3.9                  | 1.85                  | 0.76, 4.48 | 0.172   | 1.60                              | 0.65, 3.93 | 0.304   |
| Other                                                          | 8.4                | 5.0                | 7.8                | 8.3                  | 15.4                 | 2.93                  | 1.63, 5.27 | <0.001  | 2.80                              | 1.50, 5.26 | 0.001   |
| Any antidepressant without mood stabilizers                    | 17.9               | 20.7               | 38.8               | 35.7                 | 40.8                 | 2.98                  | 2.13, 4.18 | <0.001  | 2.89                              | 2.04, 4.09 | <0.001  |
| Any antidepressant without antipsychotics                      | 38.0               | 34.8               | 28.7               | 21.9                 | 25.9                 | 0.5                   | 0.36, 0.70 | <0.001  | 0.46                              | 0.33, 0.64 | <0.001  |
| Any antidepressant without mood stabilizers and antipsychotics | 14.9               | 13.0               | 19.4               | 14.2                 | 16.8                 | 1.14                  | 0.78, 1.69 | 0.498   | 1.06                              | 0.72, 1.55 | 0.783   |
| Any benzodiazepines                                            | 24.2               | 27.4               | 30.2               | 33.0                 | 30.7                 | 1.38                  | 0.98, 1.93 | 0.064   | 1.28                              | 0.93, 1.75 | 0.130   |
| Any stimulants                                                 | 5.3                | 3.5                | 6.1                | 7.6                  | 9.8                  | 2.67                  | 1.37, 5.19 | 0.004   | 4.14                              | 2.17, 7.90 | <0.001  |

Note: Data are from National Ambulatory Medical Care Survey, 1997-2016. a) Accounted for age, sex, race/ethnicity, and source of payment.

**TABLE S4.** Sample sizes of visit to psychiatrists for bipolar disorder and for schizophrenia

|                                                                             | 1997-2000 | 2001-2004 | 2005-2008 | 2009-2012 | 2013-2016 |
|-----------------------------------------------------------------------------|-----------|-----------|-----------|-----------|-----------|
| Unweighted visits to psychiatrists, in which bipolar disorder was diagnosed | 504       | 889       | 864       | 1,313     | 849       |
| Weighted visits to psychiatrists, in which bipolar disorder was diagnosed   | 467,057   | 753,228   | 867,632   | 1,074,923 | 1,059,311 |
| Proportion of bipolar disorder in visits to psychiatrists                   | 9.7%      | 14.0%     | 15.9%     | 17.4%     | 13.6%     |
| Unweighted visits to psychiatrists, in which schizophrenia was diagnosed    | 380       | 368       | 380       | 561       | 322       |
| Weighted visits to psychiatrists, in which schizophrenia was diagnosed      | 380,013   | 318,178   | 371,286   | 407,799   | 369,749   |
| Proportion of schizophrenia in visits to psychiatrists                      | 7.9%      | 5.9%      | 6.8%      | 6.6%      | 4.8%      |

Note: Data are from National Ambulatory Medical Care Survey, 1997-2016.

**TABLE S5.** Trends of medications prescribed during office-based visits to psychiatrists among patients with bipolar I disorder only by secular period, 1997-2016

|                                                                | 1997-              | 2001-              | 2005-              | 2009-              | 2013-              | Secular trends        |            |         |                                   |            |         |
|----------------------------------------------------------------|--------------------|--------------------|--------------------|--------------------|--------------------|-----------------------|------------|---------|-----------------------------------|------------|---------|
|                                                                | 2000               | 2004               | 2008               | 2012               | 2016               | Unadjusted odds ratio | 95% CI     | p-value | Adjusted odds ratio <sup>a)</sup> | 95% CI     | p-value |
| Sample size                                                    |                    |                    |                    |                    |                    |                       |            |         |                                   |            |         |
| Unweighted visits                                              | 463                | 742                | 711                | 1,093              | 724                |                       |            |         |                                   |            |         |
| Weighted visits (Row %)                                        | 433,869<br>(12.2%) | 643,448<br>(18.0%) | 710,061<br>(19.9%) | 892,690<br>(25.0%) | 891,209<br>(25.0%) |                       |            |         |                                   |            |         |
| Any antipsychotic                                              | 20.2               | 33.2               | 53.7               | 54.4               | 55.1               | 4.02                  | 2.78, 5.81 | <0.001  | 4.18                              | 2.91, 6.00 | <0.001  |
| First-generation antipsychotic                                 | 7.5                | 3.4                | 3.1                | 3.5                | 2.0                | 0.34                  | 0.16, 0.70 | 0.004   | 0.25                              | 0.12, 0.54 | <0.001  |
| Second-generation antipsychotic (SGA)                          | 13.0               | 30.6               | 51.7               | 52.6               | 53.7               | 4.97                  | 3.40, 7.29 | <0.001  | 5.33                              | 3.66, 7.76 | <0.001  |
| FDA-approved SGA                                               | 12.7               | 29.3               | 51.3               | 49.7               | 52.5               | 4.80                  | 3.27, 7.04 | <0.001  | 5.11                              | 3.49, 7.47 | <0.001  |
| Any mood stabilizer                                            | 62.4               | 49.5               | 30.5               | 25.3               | 29.0               | 0.23                  | 0.16, 0.34 | <0.001  | 0.22                              | 0.15, 0.31 | <0.001  |
| Lithium                                                        | 29.8               | 21.7               | 18.7               | 15.1               | 19.7               | 0.58                  | 0.37, 0.90 | 0.017   | 0.53                              | 0.34, 0.84 | 0.007   |
| Carbamazepine or valproic acid                                 | 36.3               | 24.2               | 8.3                | 7.5                | 5.2                | 0.08                  | 0.05, 0.12 | <0.001  | 0.07                              | 0.05, 0.12 | <0.001  |
| Lamotrigine                                                    | 2.3                | 9.0                | 5.9                | 4.8                | 4.9                | 0.87                  | 0.52, 1.47 | 0.613   | 0.83                              | 0.49, 1.41 | 0.486   |
| Other anticonvulsant                                           | 6.2                | 19.7               | 12.6               | 12.3               | 11.8               | 0.95                  | 0.61, 1.48 | 0.822   | 0.90                              | 0.58, 1.40 | 0.647   |
| Gabapentin                                                     | 6.0                | 9.2                | 4.4                | 4.8                | 4.9                | 0.59                  | 0.34, 1.01 | 0.055   | 0.51                              | 0.29, 0.89 | 0.018   |
| Oxcarbazepine                                                  | 0.0                | 5.6                | 5.0                | 3.1                | 5.4                | 1.89                  | 0.79, 4.55 | 0.151   | 1.85                              | 0.80, 4.31 | 0.152   |
| Topiramate                                                     | 0.2                | 5.5                | 4.0                | 4.6                | 2.3                | 1.07                  | 0.60, 1.88 | 0.823   | 1.15                              | 0.63, 2.09 | 0.649   |
| Any antidepressant                                             | 45.8               | 48.7               | 55.0               | 50.2               | 56.0               | 1.39                  | 1.00, 1.94 | 0.050   | 1.31                              | 0.92, 1.86 | 0.130   |
| Tricyclics or MAOI                                             | 5.8                | 3.4                | 3.4                | 2.2                | 2.8                | 0.46                  | 0.18, 1.18 | 0.105   | 0.40                              | 0.16, 1.01 | 0.052   |
| SSRI                                                           | 23.4               | 29.9               | 29.5               | 26.5               | 25.0               | 0.92                  | 0.66, 1.29 | 0.621   | 0.89                              | 0.63, 1.26 | 0.520   |
| SNRI                                                           | 3.6                | 6.4                | 13.9               | 12.7               | 11.7               | 2.44                  | 1.50, 3.98 | <0.001  | 2.24                              | 1.43, 3.50 | <0.001  |
| Other                                                          | 18.1               | 16.9               | 20.1               | 18.9               | 30.0               | 2.03                  | 1.31, 3.14 | 0.001   | 2.01                              | 1.24, 3.25 | 0.004   |
| Bupropion                                                      | 8.9                | 11.3               | 11.2               | 9.7                | 12.0               | 1.18                  | 0.75, 1.85 | 0.479   | 1.19                              | 0.73, 1.92 | 0.489   |
| Mirtazapine                                                    | 2.5                | 2.1                | 2.0                | 1.9                | 4.4                | 2.12                  | 0.85, 5.28 | 0.108   | 1.88                              | 0.73, 4.85 | 0.189   |
| Other                                                          | 8.3                | 5.1                | 7.8                | 8.6                | 16.0               | 2.99                  | 1.59, 5.63 | 0.001   | 2.98                              | 1.49, 5.96 | 0.002   |
| Any antidepressant without mood stabilizers                    | 17.1               | 19.5               | 37.8               | 35.0               | 38.3               | 2.89                  | 2.03, 4.11 | <0.001  | 2.84                              | 1.98, 4.08 | <0.001  |
| Any antidepressant without antipsychotics                      | 36.3               | 32.9               | 27.5               | 20.9               | 23.2               | 0.47                  | 0.33, 0.67 | <0.001  | 0.44                              | 0.31, 0.62 | <0.001  |
| Any antidepressant without mood stabilizers and antipsychotics | 13.8               | 11.8               | 17.8               | 13.2               | 13.8               | 1.02                  | 0.68, 1.52 | 0.930   | 0.96                              | 0.64, 1.45 | 0.858   |
| Any benzodiazepines                                            | 24.2               | 27.9               | 30.4               | 34.0               | 30.8               | 1.39                  | 0.96, 2.01 | 0.080   | 1.29                              | 0.92, 1.82 | 0.144   |
| Any stimulants                                                 | 5.5                | 3.8                | 6.2                | 7.2                | 9.3                | 2.30                  | 1.12, 4.72 | 0.024   | 3.64                              | 1.82, 7.32 | <0.001  |

Note: Data are from National Ambulatory Medical Care Survey, 1997-2016. a) Accounted for age, sex, race/ethnicity, and source of payment.
